# Supplementary material
Source: PubMed Central journal article supplement (PMC3215035)
Supplement: 1112378108_pnas.201112378SI.pdf [file 1112378108_pnas.201112378SI.pdf]

# Supporting Information

Poskanzer and Yuste 10.1073/pnas.1112378108

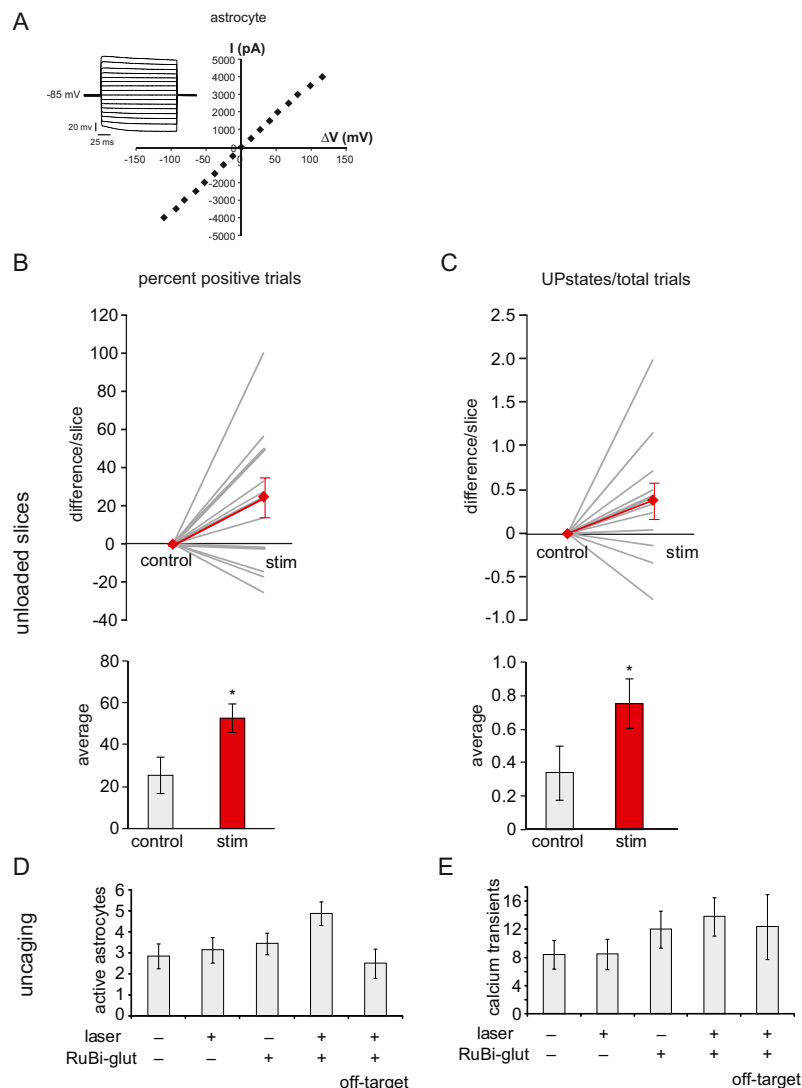

**Fig. S1.** Sulforhodamine 101 (SR101) and Fluo-4 do not affect stimulation-induced UP states by astrocytes. (A) Current-voltage (IV) plot of a patched passive astrocyte. (B and C) Stimulation (red)/control (gray) protocol as carried out in Fig. 2, with data analyzed by slice as in Fig. 2 F and G. Slices were not loaded with any dyes. (B) Percent trials with at least one UP state (positive trials). Significant difference between control ( $24.2 \pm 7.5\%$ ) and stimulation ( $49.1 \pm 6.9\%$ ) trials. (C) Number of UP states in all trials. Significant differences between control ( $0.32 \pm 0.11$ ) and stimulation ( $0.71 \pm 0.16$ ) trials ( $n = 12$  slices, 96 trials;  $*P < 0.05$ ). (D and E) Calcium data from glutamate uncaging experiments, showing active astrocytes (D) and total calcium transients (E) per trial under all conditions tested.

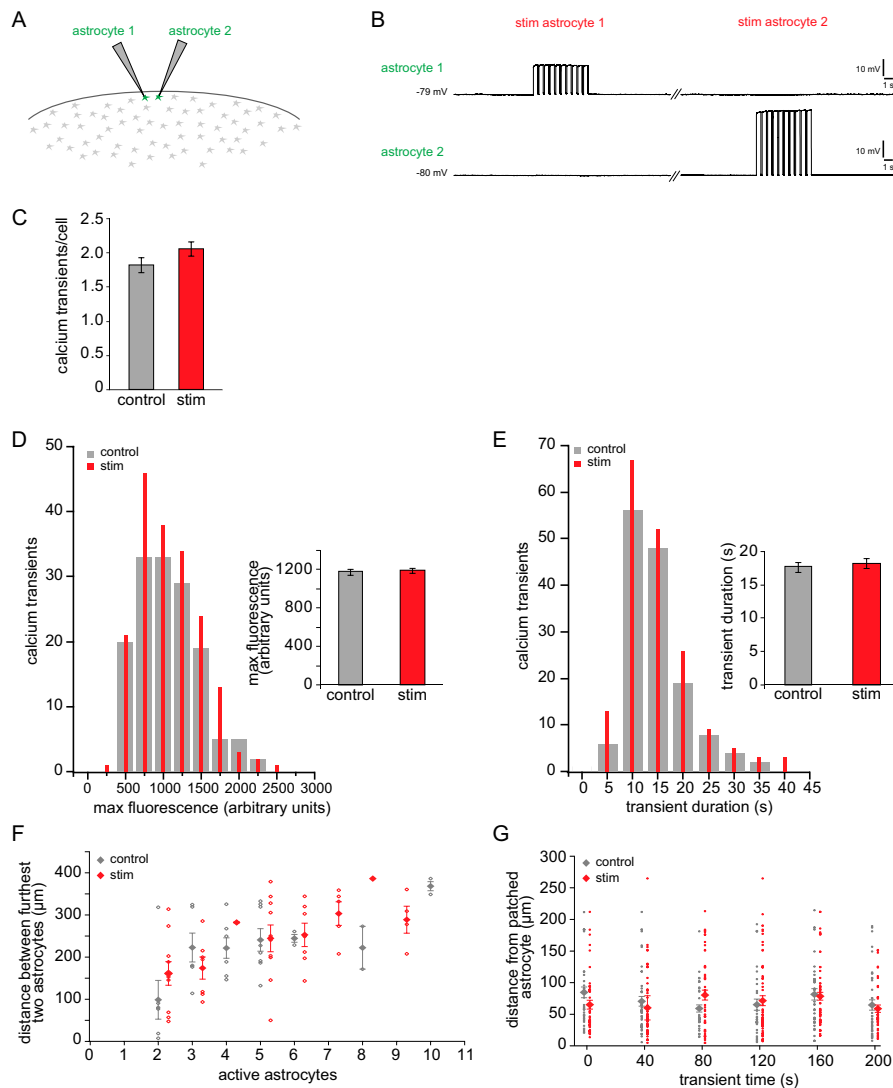

**Fig. S2.** Astrocyte calcium imaging during single-cell stimulation. (A) Schematic of dual-patch astrocyte experiment. Two neighboring astrocytes are whole-cell patch-clamped, and each one is individually depolarized as in Fig. 2A at the trial start. (B) Depolarization in an astrocyte does not spread to the neighboring astrocyte soma as measured electrophysiologically. (C) Average calcium transients in each active astrocyte for the two trial types, control (gray) and stimulated (red), are not significantly different, indicating that the differences displayed in Fig. 3 are due to the increase in active astrocytes. (D) Maximum fluorescence measurements for all calcium transients described in Fig. 3 (706 total transients). (Left) Distribution of values of transients from both control (gray) and stimulation (red) trials. (Right) Average values in two trial types. (E) Same transients as analyzed in D, showing the duration of calcium transients. (Left) Distribution histogram. (Right) Average values. No significant differences in averages were observed in either measure. (F) Spatial spread of active astrocytes, as measured by the distance between the furthest two active astrocytes in an individual trial. Data are grouped by trial type, and there is no significant difference between conditions. (G) Time of calcium transients from every active astrocyte in the two conditions, binned and plotted as a function of distance from the patched astrocyte. Similar averages across the time trial indicate an absence of calcium waves.
